# Supplementary material
Source: publisher figshare collection journal article supplement (https://karger.figshare.com/ndownloader/files/12753209)
Supplement: Supplementary file 1 [file 12753209]

## Sheet: Sheet1
Study	Neuro-anatomical Structure Visualized	Class	Taxon	Ontogenetic Status	Anatomical Region of Interest	Specimen Scale (Based on Scale Bar [mm])	Pretreatment History	Fixation	Staining Agent	Solvent	Stain Concentration (w/v)	Staining Duration	(Physical or Chemical) Stablization	Immersion or Injection Staining	CT Scanner Model	Current (μA)	Voltage (kVp)	Exposure Timing (ms)	No. of Multi-frame Averages	Filter Composition	Beam Shape	Target Material	Isometric Voxel Dimensions (μm)	Scanner or Post-processing Corrections	Scan Time (min)
Cox & Faulkes, 2014	Brain (Fig. 2)	Mammalia	Heterocephalus glaber	adult	head	5	—	—	I2KI	4% formaldehyde in PBS	0.05	2 wk	—	immersion	Metris X-Tek HMX 160 kV system	60	80	—	2	—	cone	Be	22.3	—	—
Cox & Jeffery, 2011; Cox et al., 2011, 2012	Brain (Figs., 1, 8, 12)	Mammalia	Sciurus carolinensis	adult	head	5	sacrificed, frozen	4% formaldehyde in PBS	I2KI	4% formaldehyde in PBS	0.25	7 wk	—	immersion	Metris X-Tek custom 320 kV bay system	110	195	—	—	—	—	—	80.2	—	—
Cox & Jeffery, 2011; Cox et al., 2011, 2012	Brain (Figs., 3, 10, 12)	Mammalia	Cavia porcellus	adult	head	5	sacrificed, frozen	4% formaldehyde in PBS	I2KI	4% formaldehyde in PBS	0.25	7 wk	—	immersion and injection	Metris X-Tek custom 320 kV bay system	99	215	—	—	—	—	—	80	—	—
Cox & Jeffery, 2011; Cox et al., 2011, 2012	Brain (Figs., 2, 5, 9, 12)	Mammalia	Rattus norvegicus	adult	head	5	sacrificed, frozen	4% formaldehyde in PBS	I2KI	4% formaldehyde in PBS	0.25	2 wk	—	immersion	Metris X-Tek custom 320 kV bay system	90	100	—	—	—	—	—	66.7	—	—
Degenhardt et al., 2010	CNS (Figs 1, 2)	Mammalia	Mus musculus	embryos (E10.5, E11.5, E13.5, E15.5, E17.5) and postnatal specimens (PN0)	whole	0.2–1	freshly fixed	4% paraformaldehyde in PBS	I2KI	water	0.1058	24/48/72 hs	embeded in parafin	immersion	eXplore Locus SP	80	80	1700	8	—	cone	—	16	spectral filtering of the X-ray beam (for beam hardening)	120
Faulwetter et al., 2013	Brain rendering (Fig 12c)	Polychaeta	Syllis gracilis	—	anterior end and mid-body	0.5	dehydrated to 96% EtOH	—	I2E	96% EtOH	0.01	3 d	96% EtOH	immersion	SkyScan 1172 micro-CT scanner by Bruker MicroCT	167	60	1165	—	—	cone	—	1.4	—	04:56:00
Fernandez et al., 2014	Cerebral ganglia (Fig. 2)	Clitellata	Aporrectodea caliginosa	—	whole	2	freshly fixed	95% EtOH	I2KI	ethanol	0.1	4 or 10 d	—	immersion	SkyScan 1173 micro-CT scanner by Bruker MicroCT	100	65	1000	2–6	—	cone	W	8.88	flat field correction, artifact correction 5–11, beam hardening correction, NO smoothing	—
Gignac & Kley, 2014	Brain & cranial nerves (Figs 1–5; Gignac & Kley; Fig 5 of this study)	Reptilia	Alligator mississippiensis	neonate	head	5	(not frozen)	10% NBF	I2KI	water	0.1125	2 wk	—	immersion	Phoenix v tome GE S240	135	200	333	3	Cu (0.3 mm)	cone	Mo	31.6	CMYK to RBG	90–300
Gignac & Kley, 2014	Brain & cranial nerves (Figs 2, 4)	Reptilia	Alligator mississippiensis	subadult	head	5	(not frozen)	10% NBF	I2KI	water	0.1125	4 wk	—	—	Phoenix v tome GE S240	145	160	333	3	Cu (0.2 mm)	cone	Mo	35.7	—	90–300
Gignac & Kley, 2014; Balanoff et al., 2016	Brain (Fig. 2)	Aves	Dromaius novaehollandiae	juvenile	head	5	(not frozen)	10% NBF	I2KI	water	0.1125	4 wk	—	—	Phoenix v tome GE S240	130	190	333	3	Cu (0.1 mm)	cone	Mo	38.4	—	90–300
Jeffery et al., 2011	Brain (Fig. 2)	Mammalia	Mus musculus	adult	head	3	fixed prior to study	4% formaldehyde in PBS	I2KI	water	0.0375	7 hr	—	immersion	Metrix X-Tek custom 320 kV bay system	105	75	—	—	—	—	—	10	—	25–60
Lautenschlager et al., 2013	Brain (Fig. 1)	Aves	Buteo buteo	adult	head	20	obtained from veterinarian, freshly frozen	4% formaldehyde in PBS	I2KI	4% formaldehyde in PBS	0.1	1 wk	—	immersion	Metris X-Tek HMX 160 kV system	60	95	—	—	—	cone	—	58.1	—	—
Metscher, 2009a	Brain (Fig 5)	Actinopterygii	Esox lucius	neonate	whole	0.5	freshly fixed	10% NBF	I2KI	water	0.003	overnight	wash in water	immersion	Xradia MicroXCT X-ray imaging system	200	30	20000	1	—	cone	W	4	—	240
Metscher, 2009a	CNS (Fig. 9)	Mammalia	Mus musculus	embryo (Theiler stage 21)	whole	—	freshly fixed	paraformaldehyde	I2KI	water	0.01	overnight	wash in water	immersion	Xradia MicroXCT X-ray imaging system	100	80	13000	1	—	cone	W	9	—	156
Metscher, 2009b	Neural tube (Figs. 3, 7)	Aves	Gallus gallus	embryo (Hamburger and Hamilton stage 25)	whole	0.5	—	10% NBF + 4F1G: 3.7% (or 4%) formaldehyde, 1% glutaraldehyde in 0.1M phosphate buffer	I2KI	water	0.003	30 minutes	wash in water + dehydrate in EtOH	immersion	Xradia MicroXCT X-ray imaging system	—	40	20000	1	Be	cone	W	5.1	2 x 2 pixel binning	—
Metscher, 2009b	Neural tube, Brain (Fig 1, 6, 7)	Aves	Gallus gallus	embryo (Hamburger and Hamilton stage 24)	whole	—	—	10% NBF + 4F1G: 3.7% (or 4%) formaldehyde, 1% glutaraldehyde in 0.1M phosphate buffer	I2KI	water	0.003	overnight	wash in water + dehydrate in EtOH	immersion	Xradia MicroXCT X-ray imaging system	—	40	20000	1	Be	cone	W	0.97	—	—
Silva et al., 2015	Cerebellum (Supplemental Fig. 2)	Mamalia	Mus musculus	adult	brain	0.15–0.5	1 hr in each of 50, 70, 80, 90, 96, 100% EtOH	4% formaldehyde in PBS	I2E	100% EtOH	0.01	14 hr	washed with and scanned in 100% EtOH	immersion	Zeiss Xradia Versa 500	—	50, 70	1000—10000	—	—	—	—	2–27	2 x 2 pixel binning	—
Sombke et al., 2015	Brain (Fig 1)	Insecta	Vespa crabro	adult	head	0.3–1	freshly fixed	Duboscq-Brasil (alcoholic Bouin's) solution	I2E	EtOH	0.01	overnight	washed several times in ≥ 99.8% EtOH + critical point drying + slow heating process + gas discharge	—	Xradia MicroXCT-200 X-ray imaging system	200	30	10000	—	—	cone	—	6.38	4-pixel binning during scanning phase to reduce noise, but reconstructed at full resolution	—
Sombke et al., 2015	Brain (Fig. 1)	Insecta	Vespa crabro	adult	head	0.3–1	freshly fixed	Duboscq-Brasil (alcoholic Bouin's) solution	I2E	EtOH	0.01	overnight	washed several times in ≥ 99.8% EtOH + critical point drying + slow heating process + gas discharge	—	Xradia MicroXCT-200 X-ray imaging system	200	30	3000	—	—	cone	—	2.08	4-pixel binning during scanning phase to reduce noise, but reconstructed at full resolution	—
Sombke et al., 2015	Brain (Fig. 1)	Insecta	Lucilia sp.	adult	head	0.2–1	freshly fixed	70% EtOH	I2E	EtOH	0.01	overnight	washed several times in ≥ 99.8% EtOH + critical point drying + slow heating process + gas discharge	—	Xradia MicroXCT-200 X-ray imaging system	200	30	1000	—	—	cone	—	4.97	4-pixel binning during scanning phase to reduce noise, but reconstructed at full resolution	—
Sombke et al., 2015	Brain, antennal nerve (Fig. 1, 3)	Insecta	Lucilia sp.	adult	head	0.2–1	freshly fixed	Bouin’s solution	I2E	EtOH	0.01	overnight	washed several times in ≥ 99.8% EtOH + critical point drying + slow heating process + gas discharge	—	Xradia MicroXCT-200 X-ray imaging system	200	30	1500	—	—	cone	—	5.35	4-pixel binning during scanning phase to reduce noise, but reconstructed at full resolution	—
Sombke et al., 2015	Brain, antennal nerve (Fig. 1, 3)	Insecta	Lucilia sp.	adult	head	0.2–1	freshly fixed	Bouin’s solution	I2E	EtOH	0.01	overnight	washed several times in ≥ 99.8% EtOH + critical point drying + slow heating process + gas discharge	—	Xradia MicroXCT-200 X-ray imaging system	200	30	1000	—	—	cone	—	5.49	4-pixel binning during scanning phase to reduce noise, but reconstructed at full resolution	—
Sombke et al., 2015	Brain, antennal nerve (Fig. 1, 3)	Insecta	Lucilia sp.	adult	head	0.2–1	freshly fixed	Bouin’s solution	I2E	EtOH	0.01	overnight	washed several times in ≥ 99.8% EtOH + critical point drying + slow heating process + gas discharge	—	Xradia MicroXCT-200 X-ray imaging system	200	30	2000	—	—	cone	—	2.15	4-pixel binning during scanning phase to reduce noise, but reconstructed at full resolution	—
Sombke et al., 2015	Brain (Fig. 4)	Insecta	Sarcophaga carnaria	adult	head	1	freshly fixed	Bouin’s solution	I2E	EtOH	0.01	overnight	washed several times in ≥ 99.8% EtOH + critical point drying + slow heating process + gas discharge	—	Xradia MicroXCT-200 X-ray imaging system	200	30	1500	—	—	cone	—	5.13	4-pixel binning during scanning phase to reduce noise, but reconstructed at full resolution	—
Sombke et al., 2015	Brain (Fig. 4)	Insecta	Sarcophaga carnaria	adult	head	1	freshly fixed	Bouin’s solution	I2E	EtOH	0.01	overnight	washed several times in ≥ 99.8% EtOH + critical point drying + slow heating process + gas discharge	—	Xradia MicroXCT-200 X-ray imaging system	200	30	1000	—	—	cone	—	5.49	4-pixel binning during scanning phase to reduce noise, but reconstructed at full resolution	—
Sombke et al., 2015	Brain, gnathal ganglia (Fig. 2)	Insecta	Drosophila hydei	adult	head	0.05–0.2	freshly fixed	Bouin’s solution	I2E	EtOH	0.01	overnight	washed several times in ≥ 99.8% EtOH + critical point drying + slow heating process + gas discharge	—	Xradia MicroXCT-200 X-ray imaging system	200	30	9000	—	—	cone	—	0.5	4-pixel binning during scanning phase to reduce noise, but reconstructed at full resolution	—
Tahara & Larson, 2013	Spinal cord and rendering (Figs. 5, 7)	Aves	Coturnix coturnix	embryo (incubated for 15–16 d)	whole	10	—	4% formalin in PBS and 1% glutaraldehyde	I2KI	4% formaldehyde in PBS / 75%EtOH	0.0375	2–28 d	4% formaldehyde in PBS wash, plastic tube	immersion	SkyScan 1172	80	80	885	8	Al (0.5 mm)	cone	—	13	2 x 2 pixel binning	60
Tobita et al., 2010	Brain (Figs 4, 7)	Mammalia	Mus musculus	neonate	whole	10	—	formalin	I2KI	water	2.5% I2 / 1.5% KI	96 hr	—	—	—	—	—	—	—	—	—	—	45	—	—
Holliday et al., 2013	Brain & cranial nerves (Figs. 4, 6)	Reptilia	Alligator mississippiensis	subadult	head	—	freshly frozen	10% formalin	I2KI	water	0.1	5 wk	sponge in oral cavity	immersion	Siemens Inveon MicroCT scanner	500	80	—	—	—	cone	—	83	—	—
George & Holliday, 2013	Brain & cranial nerves (Fig. 1)	Reptilia	Alligator mississippiensis	subadult	head	—	freshly frozen	10% formalin	I2KI	water	0.1	5 wk	sponge in oral cavity	immersion	Siemens Inveon MicroCT scanner	500	80	—	—	—	cone	—	83	—	—
Wong et al., 2012	Brain & spinal cord (Figs. 1–5, 9)	Mammalia	Mus musculus	embryo (E15.5)	whole	2	—	4% formaldehyde in PBS	I2KI	water	0.01	17 hr	agarose medium	immersion	MS9 MicroCT GE	181	55	1260	—	Al (0.5 mm )	cone	W	28	2 x 2 pixel binning	120
Wong et al., 2013	Brain & spinal cord (Figs. 3, 4)	Mammalia	Mus musculus	embryo (E15.5)	whole	2	hydrogel for 24hr	4% formaldehyde in PBS	I2KI	water	0.01	24 hr	hydrogel + agarose medium	immersion	SkyScan 1172 micro-CT scanner by Bruker MicroCT	181	55	1225	—	Al (0.5 mm )	cone	W	27	2 x 2 pixel binning	281
Wong et al., 2013	Brain & spinal cord (Fig. 3)	Mammalia	Mus musculus	embryo (E15.5)	whole	2	—	4% formaldehyde in PBS	I2KI	water	0.04	24 hr	agarose medium	immersion	SkyScan 1172 micro-CT scanner by Bruker MicroCT	142	70	1280	—	Al + Cu	cone	W	27	2 x 2 pixel binning	281
Wong et al., 2012; 2013; Gignac et al. 2016	Brain & spinal cord (Fig. 1 in each reference)	Mammalia	Mus musculus	embryo (E15.5)	whole	2	hydrogel for 24hr	4% formaldehyde in PBS	I2KI	water	0.04	72 hr	hydrogel + agarose medium	immersion	SkyScan 1172 micro-CT scanner by Bruker MicroCT	142	79	1280	—	Al + Cu	cone	W	27	2 x 2 pixel binning	281
Wong et al., 2014	Brain & spinal cord (Figs. 1,2,5–7)	Mammalia	Mus musculus	embryo (E15.5)	whole	2	hydrogel for 24hr	4% formaldehyde in PBS	I2KI	water	0.01	24 hr	hydrogel + agarose medium	immersion	SkyScan 1172 micro-CT scanner by Bruker MicroCT	100	100	—	—	Al + Cu	cone	W	28	2 x 2 pixel binning	281
Gignac et al. 2016	Brain & spinal cord (Fig. 1)	Reptilia	Alligator mississippiensis	hatchling (PN0)	whole	—	—	—	I2KI	water	—	—	—	—	—	—	—	—	—	—	—	—	—	—	—
Gignac et al. 2016	Brain, cranial nerves, & spinal cord (Fig. 1 of Gignac et al., ; Fig. 2 of this study)	Amphbia	Rana sylvatica	adult	head	—	freshly fixed	10% NBF	I2KI	water	0.05	7 d	washed in water	immersion	Phoenix v tome GE S240	270	140	333	3	Cu (0.1 mm)	cone	W	35.071	—	33
Gignac et al. 2016	Brain & spinal cord (Fig. 1)	Aves	Tyto alba	neonate	whole	—	found dead, frozen, then fixed	10% NBF	I2KI	water	0.05	10 d	—	immersion	GE eXplore Locus in vivo Small Animal MicroCT	450	80	400	7	—	cone	—	90	—	120
Gignac et al. 2016	Brain & cranial nerves (Fgi. 4)	Reptilia	Crotalus atrox	adult	head	—	freshly fixed	10% NBF	I2KI	water	0.075	21 d	washed in water	immersion	Phoenix v tome GE S240	180	140	400	2	Cu (1 mm)	cone	W	23.115	—	180
Gignac et al. 2016	Brain & cranial nerves (Fig. 4)	Mammalia	Ornithorhynchus anatinus	adult	head	—	—	—	I2KI	water	0.075	21 d	washed in water	immersion	Phoenix v tome GE S240	160	190	333	3	Cu (0.1 mm)	cone	W	30.039	—	210
Gignac et al. 2016	Brain (Fig. 8)	Aves	Phasianus colchicus	adult	head	—	freshly fixed	10% NBF	I2KI	10% NBF	11%, then 6%	over 2 mo, then 2 wk	—	immersion	Xradia MicroXCT-400 X-ray imaging system	83	120	2500	1	SiO2 (1 mm)	cone	W	47.89	beam hardening correction set to 0.15	151
Carlisle et al., 2017	Brain rendering	Mammalia	Monodelphis domestica	developmental series	head	10	hydrogel	10% formalin	I2KI	water	0.0175	4 d	hydrogel (STABILITY, modified)	immersion	Inveon multimodel Siemens PET/CT scanner & Phoenix v tome GE S240	—	—	—	—	—	cone	—	20.03–60.24	—	—
Carlisle et al., 2017	Brain & brain rendering (Fig. 3, Supplementary Fig. S1)	Mammalia	Macropus eugenii	developmental series	head	10	hydrogel	10% formalin	I2KI	water	0.0175	4 d	hydrogel (STABILITY, modified)	immersion	Inveon multimodel Siemens PET/CT scanner & Phoenix v tome GE S240	—	—	—	—	—	cone	—	35.8–60.24	—	—
Carlisle et al., 2017	Brain rendering	Mammalia	Trichosurus vulpecula	developmental series	head	10	hydrogel	10% formalin	I2KI	water	0.0175	4 d	hydrogel (STABILITY, modified)	immersion	Inveon multimodel Siemens PET/CT scanner & Phoenix v tome GE S240	—	—	—	—	—	cone	—	14.58–60.24	—	—
Nasrullah et al., 2017	Brain, eye (Fig. 1)	Mammalia	Macropus eugenii	fetal and postnatal stages	head	2	stored in 100% MeOH or 70% EtOH	4% paraformaldehyde in PBS	I2KI	water	1.44% (reported as 1.5%)	2–28 d	washed in distilled water	immersion	Zeiss Xradia 520 Versa microCT	7–24	80–130	1000–16000	—	—	cone	—	4.93–42.80	—	1–1200
Nasrullah et al., 2017	Eye (Fig. 1)	Mammalia	Macropus eugenii	fetal and postnatal stages	head	2	stored in 100% MeOH or 70% EtOH	4% paraformaldehyde in PBS	I2KI	water	1.44% (reported as 1.5%)	2–28 d	washed in distilled water	immersion	Australian Synchrotron Imaging	—	34 (KeV)	500	—	—	—	—	6.11	—	1–1200
Nasrullah et al., 2017	Olfactory bulb (Fig. 1)	Mammalia	Macropus eugenii	fetal and postnatal stages	head	2	stored in 100% MeOH or 70% EtOH	4% paraformaldehyde in PBS	I2KI	water	1.44% (reported as 1.5%)	2–28 d	washed in distilled water	immersion	Australian Synchrotron Imaging	—	32 (KeV)	500	—	—	—	—	6.11	—	1–1200
Porro and Richards, 2017	Brain & CNS + PNS (Figs. 1, 11)	Amphibia	Xenopus laevis	adult	whole	3	—	4% paraformaldehyde in PBS	I2KI	water	0.0375	60 hr	—	immersion	X-Tek H 225 μCT scanner	290	72	—	—	—	cone	—	17	—	—
Girard et al., 2016	Brain (Graphical Abstract, Fig. 2)	Mamalia	Mus musculus	4 mo old	head	—	—	10% NBF	I2KI	water	0.0375	96 hr	blotted dry	immersion	Phoenix v tome GE S240 w/ 180 kV nanofocus X-ray tube	110 μA (reported as 110 mA)	90	500	3	—	cone	Diamond	9.5–19.0	—	34
Girard et al., 2016	Brain (Graphical Abstract, Fig. 2)	Mamalia	Mus musculus	4 mo old	head	—	—	10% NBF	I2KI	deionized water	0.0375	96 hr	blotted dry	immersion	Phoenix v tome GE S240 w/ 180 kV nanofocus X-ray tube	110 μA (reported as 110 mA)	90	500	3	—	cone	Diamond	9.5–19.0	—	34
Gold et al., 2016; This study	Brain (Fig. 1, Supplementary Fig. S2 of Gold et al.; Fig 2 of this study)	Aves	Sternus vulgarus	adult	extracted brain	—	freshly fixed, brain removed for staining	10% NBF	I2KI	deionized water	0.0525	2 wk	washed in distilled water	immersion	Phoenix v tome GE S240	220	90	—	—	Cu (0.1 mm)	cone	W	18.1	—	—
Hughes et al., 2016	Brain (Fgi. 7)	Reptilia	Rhampholeon boulengeri	adult	head	—	transcardial, field fixation per Hughes et al., 2016	4% formaldehyde without methanol stabilizer	I2KI	deionized water	0.0375	7 d	washed in distilled water	immersion	Phoenix v tome GE S240	150	130	400	3	Cu (0.1 mm)	cone	W	16.185	—	45
Hughes et al., 2016	Brain (Fgi. 7)	Reptilia	Trioceros johnstoni	adult	head	—	transcardial, field fixation per Hughes et al., 2016	4% formaldehyde without methanol stabilizer	I2KI	deionized water	0.0525	3 wk	washed in distilled water	immersion	Phoenix v tome GE S240	180	140	400	3	Cu (0.1 mm)	cone	W	29.476	—	90
Li & Clarke, 2016	Brain (Fig. 3)	Aves	Chen caerulescens	post-hatching	head	—	—	10% NBF, > 99% ETOH	I2E	EtOH	0.01	1 mo	—	immersion	(customized) North Star Imaging microCT system	150	125	—	—	—	—	—	76.8	—	—
Li & Clarke, 2016	Brain (Fig. 3)	Aves	Aythya americana	post-hatching	head	—	—	10% NBF	I2KI	water	0.07	2 mo, 1 replacement	—	immersion	(customized) North Star Imaging microCT system	220	200	—	—	—	—	—	71.44	—	—
Li et al. 2016	Brain & spinal cord (Figs. 2, 4)	Aves	Nothoprocta perdicardia	post-hatching	head	10	freshly fixed	10% NBF	I2KI + NFB	10% NBF	Stepwise: (1) 1% w/v (0.5g I2 + 1g KI)/(150mL NBF); (2) 2% w/v (2g I2 + 4g KI)/(300mL NBF), & (3) 3% w/v (2g I2 + 4g KI)/(200mL NBF)	6, 12, then 13 d, respectively	—	immersion	Xradia (Zeiss) MicroXCT-400 X-ray imaging system	10000 (reported as 10 mA)	120	—	—	—	cone	W	42.39	—	—
Li et al. 2016	Brain & spinal cord (Figs. 2, 4)	Aves	Nothoprocta perdicardia	post-hatching	head	10	freshly fixed	10% NBF + 70% EtOH for 1 yr	I2E	EtOH	0.01	29 d (refresh at day 14)	—	immersion	Xradia (Zeiss) MicroXCT-400 X-ray imaging system	10000 (reported as 10 mA)	120	—	—	—	cone	W	42.3	—	—
This study	Brain (Fig. 2)	Actinopterygii	Gnathonemus petersii	adult	head	—	freshly fixed	10% NBF	I2KI	water	0.05	3 wk	washed in tap water	immersion	Phoenix v tome GE S240	250	200	200	3	Cu (0.1 mm)	cone	W	42.11	—	20
This study	Brain, trigeminal nerve (Figs. 2, 3, 4)	Reptilia	Liasis mackloti	adult	head	—	freshly fixed	10% NBF	I2KI	water	0.05	3 wk (2x refreshes)	24 hr wash in running tap water	immersion	Phoenix v tome GE S240	140	150	333	6	Cu (0.1 mm)	cone	W	20.459	—	560
This study	Brain, trigeminal nerve (Fig. 3)	Reptilia	Antaresia maculosa	adult	head	—	freshly fixed	10% NBF	I2KI	water	0.05	3 wk (2x refreshes)	24 hr wash in running tap water	immersion	Phoenix v tome GE S240	130	120	333	6	Cu (0.1 mm)	cone	W	22.984	—	450
This study	Brain (Figs. 1, 2)	Mammalia	Homo sapiens	adult	extracted brain	—	perfusion embalmed	37% formaldehyde solution	I2KI	deionized water	0.05	3 wk (2x refreshes)	washed in distilled water	immersion	X-Tek H 225 μCT scanner	67	217	354	2	Cu (0.1 mm)	cone	W	63.02	—	75
Abbreviations		Meaning
—		information not provided, not available, or not applicable
µA		micro-amperage
Al		aluminum
CT		computed tomography
Cu		copper
d		day(s)
EtOH		ethanol
hr		hour(s)
I2E		iodine dissolved in 100% EtOH
I2KI		Lugol's iodine
kV		kilovolt(s)
M		molar
MeOH		methanol
min		minute(s)
mm		millimeter(s)
mo		month(s)
Mo		molybdenum
ms		millisecon(s)
NBF		neutral buffered formalin
PBFS		4% formaldehyde in PBS
PBS		phosphate buffered saline
SiO2		silicon dioxide
sp.		species
W		tungsten
wk		week(s)
